# Supplementary material
Source: publisher site journal article supplement (https://static.cambridge.org/content/id/urn:cambridge.org:id:article:S0007114520001853/resource/name/S0007114520001853supp002.docx)
Supplement: Supplementary file 1 [file S0007114520001853supp002.docx]

Initial total subjects

N = 581

Exclusion from study with reasons as follows (n=381)

1. Did not respond to staff (n=71) or declined (n=39)
2. Antibiotic use in past month or treatment of exclusionary GI or autoimmune disorder (e.g., inflammatory bowel disease) in past year (n=77)
3. History of cancer (n=7)
4. Current smoker (n=16)
5. Major intestinal surgery or other condition that restricts dietary intake (n=10)
6. Age or BMI criteria not met (n=142)
7. Did not return stool collection kit or dietary assessment (n=10)

Exclusion from study with reasons as follows (n=93)

1. Did not respond to study staff (n=35)
2. Antibiotic use in the past month or treatment of exclusionary GI or autoimmune disorder (e.g., inflammatory bowel disease) in past year (n=25)
3. History of cancer (n=2)
4. Current smoker (n=2)
5. Major intestinal surgery or other condition that restricts dietary intake (n=5)
6. Did not return stool collection kit or dietary assessment (n=24)

Cancer free-patient volunteers identified in the colonoscopy clinic (n=132)

Healthy volunteers from the medical center community (n=449

Eligible subjects recruited to study (n=39)

Eligible subjects recruited to study (n=68)

Exclusion in the analysis

1. Did not pass the microbiome data quality filtering criteria (n=3)

Exclusion in the analysis

1. Did not pass the microbiome data quality filtering criteria (n=3)

Subjects included in analysis

N = 36

Subjects included in analysis

N = 65

Total subjects included in the analysis

N = 101

**Supplemental Figure 1. Flow Chart for study participant inclusion**


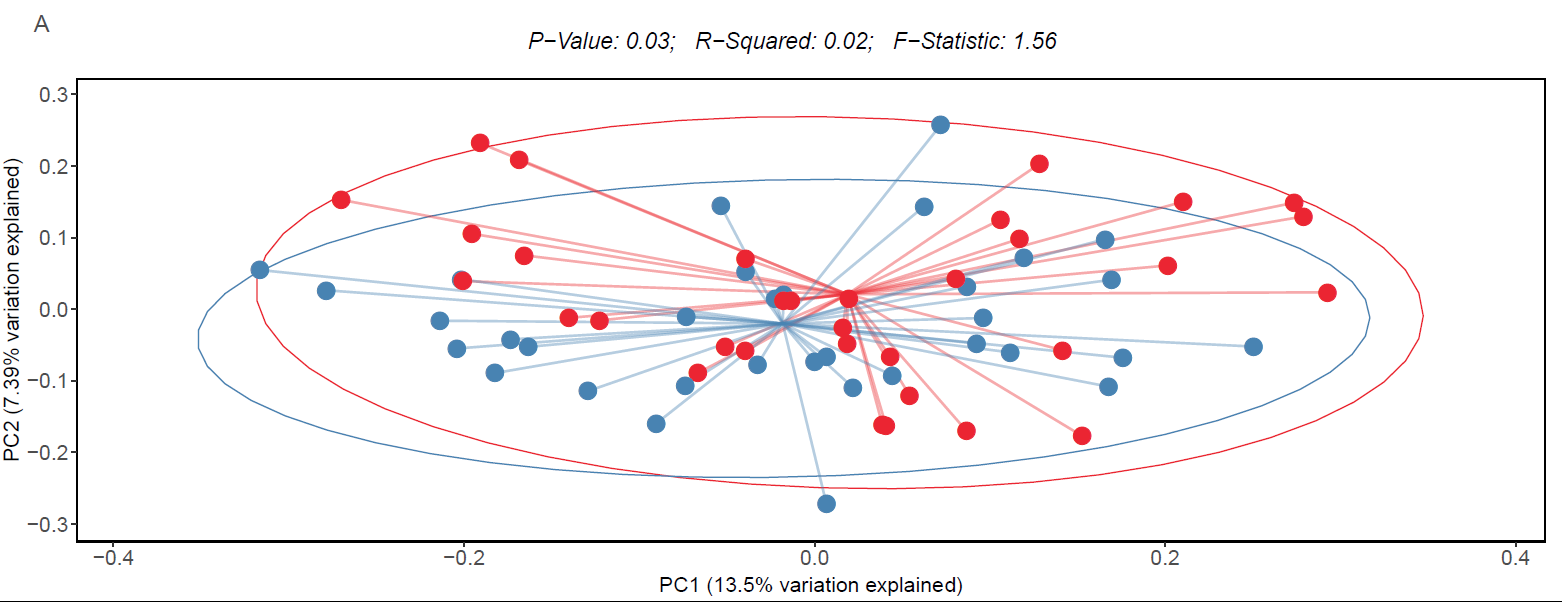

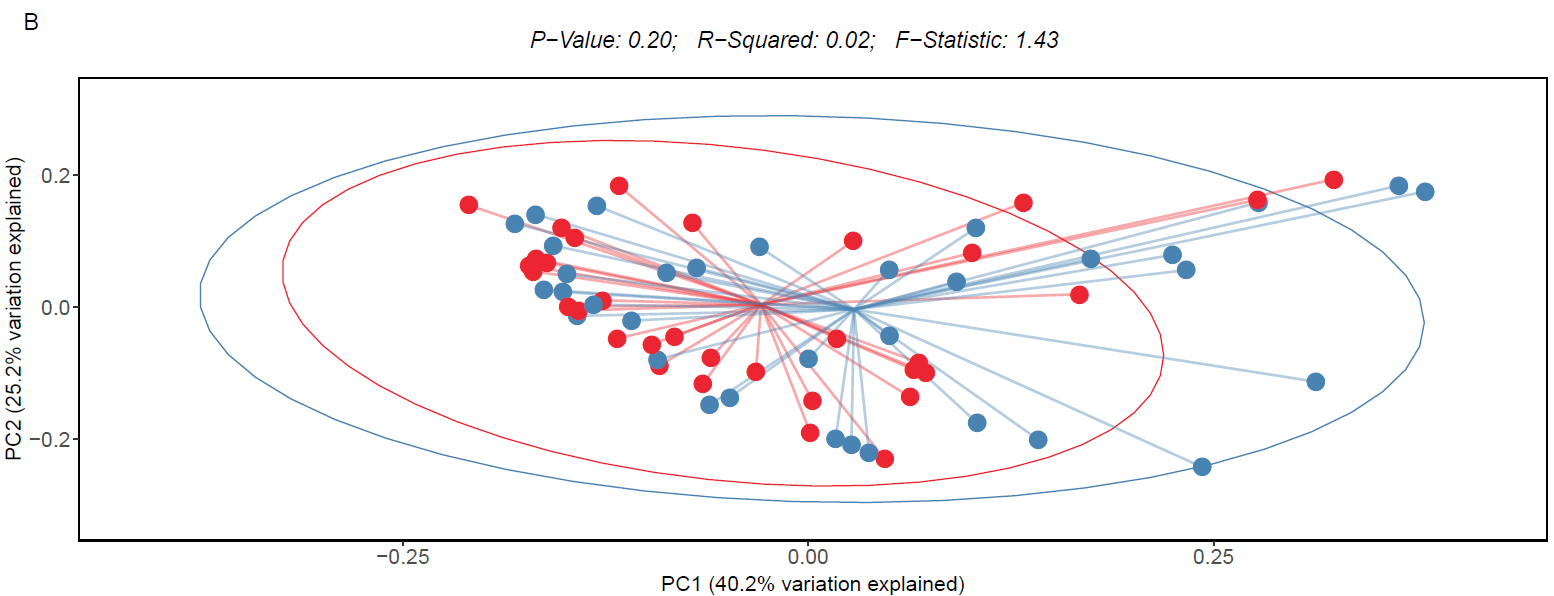


| 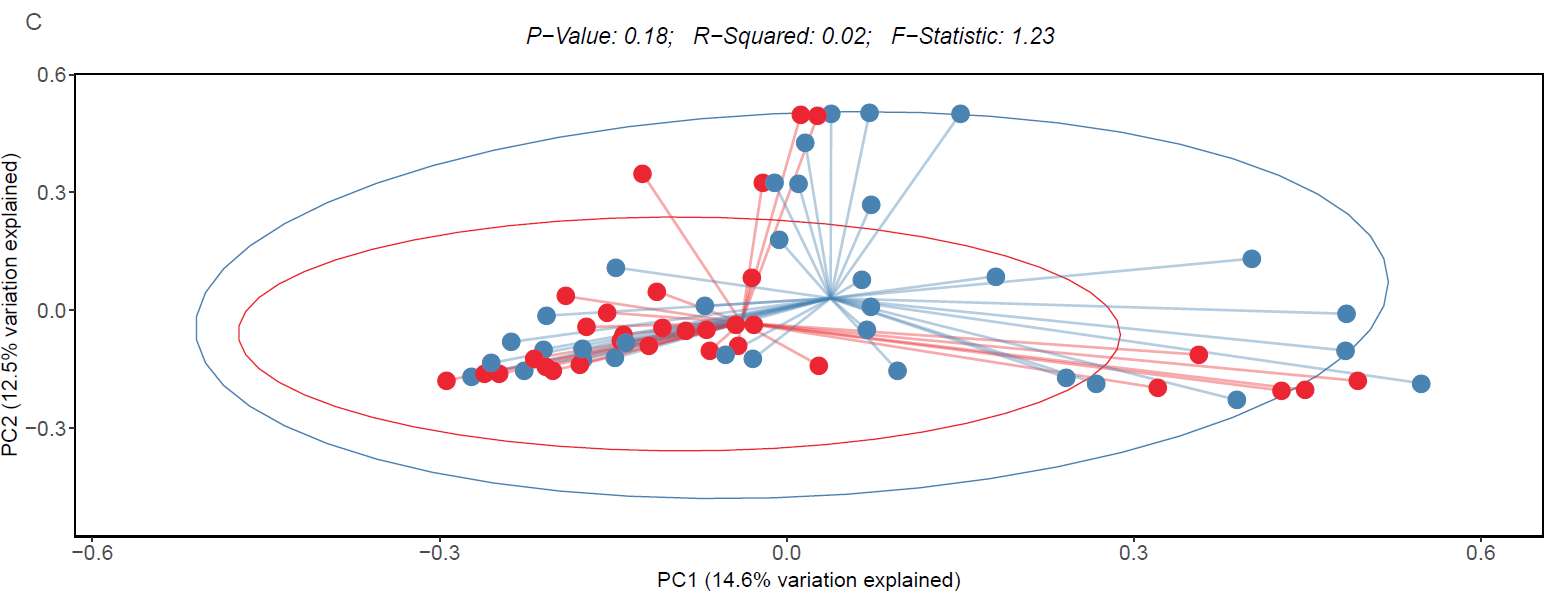 |
| --- |
| most anti-inflammatory diet  E-DII group 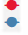 most pro-inflammatory diet  **Supplemental Figure 2. Bacterial community level differences by E-DII,** as assessed by the following beta-diversity metrics (A) Unweighted Unifrac, (B) Weighted Unifrac and (C) Jaccard |
|  |
